# Supplementary material for: Identification of Diagnostic CpG Signatures in Patients with Gestational Diabetes Mellitus via Epigenome‐Wide Association Study Integrated with Machine Learning
Source: Hindawi journal article supplement (doi:10.1155/2021/1984690), 2021-01-01

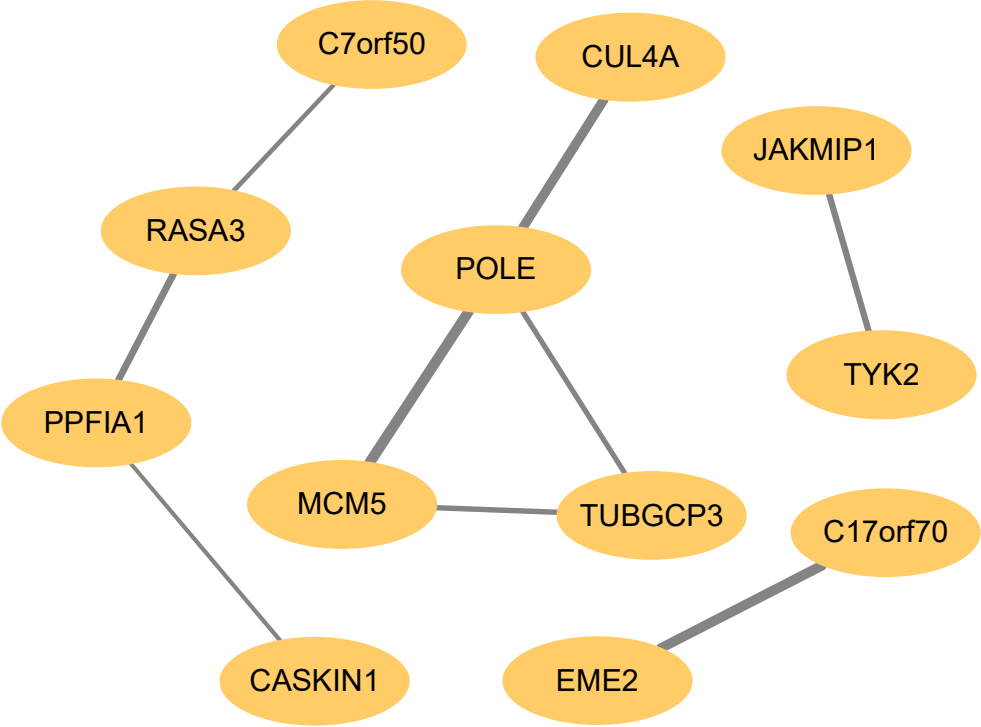

Supplement: f1 [file 1984690.f1.pdf]
