# Supplementary material for: Identification of Diagnostic CpG Signatures in Patients with Gestational Diabetes Mellitus via Epigenome-Wide Association Study Integrated with Machine Learning
Source: Biomed Res Int. 2021 May 19;2021:1984690. doi: 10.1155/2021/1984690 (PMC8162250; doi:10.1155/2021/1984690)
Supplement: Supplementary 2 — Table S1: the gene annotation of 62 identified CpG sites-related genes. Table S2: the information of GO and KEGG analyses based on the identified CpG site-related genes. Table S3: the sample information of the training set and testing set in the GSE88929 dataset. [file 1984690.f2.zip]

Archive with 3 entries (3 files):
- Table S1.docx
- Table S2.docx
- Table S3-revised.docx
